# Supplementary material for: Machine Learning Approximations to Predict Epigenetic Age Acceleration in Stroke Patients
Source: MDPI journal article supplement (doi:10.3390/ijms24032759), 2023-02-01
Supplement: s1 [file s1]

**Supplementary table S1: Missing data of each variable and imputed variables**

|                                      | Missing data | Imputation |
|--------------------------------------|--------------|------------|
| Age                                  | 0            | -          |
| Biological Age                       | 0            | -          |
| Sex                                  | 0            | -          |
| Basal mRS                            | 0            | -          |
| Smoking                              | 10           | Yes        |
| Alcoholism                           | 34           | Yes        |
| Drug consumption                     | 30           | Yes        |
| Weight                               | 57           | Yes        |
| Height                               | 83           | Yes        |
| BMI                                  | 90           | Yes        |
| Waist                                | 238          | -          |
| Hypertension                         | 0            | -          |
| Diabetes                             | 0            | -          |
| Hyperlipidemia                       | 0            | -          |
| Ischemic heart disease               | 0            | -          |
| Atrial fibrillation                  | 0            | -          |
| Heart ejection fraction              | 621          | -          |
| Moderate physical activity           | 897          | -          |
| Brain parenchymal fraction           | 740          | -          |
| Laboratory determinations:           |              |            |
| Leukocytes                           | 18           | Yes        |
| Neutrophils                          | 26           | Yes        |
| Lymphocytes                          | 61           | Yes        |
| Monocytes                            | 57           | Yes        |
| Total cholesterol                    | 120          | Yes        |
| Triglycerides                        | 123          | Yes        |
| HDL                                  | 177          | Yes        |
| LDL                                  | 174          | Yes        |
| HbA1c                                | 480          | -          |
| Creatinine                           | 239          | -          |
| Estimated glomerular filtration rate | 242          | -          |
| C-reactive protein                   | 284          | -          |
| Diet variables (daily intake):       |              |            |
| Energy                               | 805          | -          |
| carbohydrates                        | 805          | -          |
| proteins                             | 805          | -          |
| Total fat                            | 805          | -          |
| Saturated fat                        | 805          | -          |
| Monounsaturated fat                  | 805          | -          |
| Polyunsaturated fat                  | 805          | -          |
| Cholesterol                          | 805          | -          |
| Fiber                                | 805          | -          |
| Coffee                               | 235          | -          |
| Mediterranean score                  | 900          | -          |

The table shows missing data of all the variables registered from the 952 individuals, and the information about which variables were imputed.

**Supplementary table S2: Hyperparameters tunned during the training phase for each model**

| <b>Model</b>           | <b>Hyperparameters</b> | <b>Best tuning</b> |
|------------------------|------------------------|--------------------|
| Elastic Net Regression | Alpha                  | 0.184              |
|                        | Lambda                 | 0.776              |
| K Nearest Neighbors    | K                      | 20                 |
| Random Forest          | mtry                   | 10                 |
|                        | Split rule             | Variance           |
|                        | Minimum node size      | 10                 |
| Support vector machine | Sigma                  | 0.024              |
|                        | C                      | 0.25               |
| Multilayer perceptron  | Activation function    | Identity           |
|                        | Alpha                  | 0.0001             |
|                        | Hidden layers          | (20, 10, 5)        |
|                        | Learning rate          | Adaptative         |
|                        | Maximum iterations     | 10000              |
|                        | Solver                 | SGD                |

The table shows which hyperparameters were tunned via cross validation for each model. We also show the best performing configuration in each case (lower root mean squared error).

Keyword: SGD, Stochastic Gradient Descent.

**Supplementary table S3: Lineal regression model**

|                         | <b>Beta value</b> | <b>Standard Error</b> | <b>t value</b> | <b>P value</b> |
|-------------------------|-------------------|-----------------------|----------------|----------------|
| Smoking                 | -0.73             | 0.61                  | -1.19          | 0.233          |
| Alcoholism - Ex >1 year | -0.91             | 1.12                  | -0.81          | 0.418          |
| Alcoholism - Yes        | 1.59              | 0.61                  | 2.60           | 0.009          |
| Age (C-Age)             | -0.29             | 0.02                  | -12.47         | 2.28E-32       |
| Sex - Male              | 1.09              | 0.63                  | 1.72           | 0.085          |
| Weight (kg)             | 0.02              | 0.02                  | 0.85           | 0.397          |
| Height (cm)             | 0.05              | 0.03                  | 1.48           | 0.139          |
| Drug consumption        | -1.44             | 1.73                  | -0.83          | 0.404          |
| Atrial fibrillation     | 0.55              | 0.53                  | 1.05           | 0.294          |
| Leukocytes (log)        | 0.82              | 1.17                  | 0.70           | 0.486          |
| Ischemic heart disease  | -0.81             | 0.68                  | -1.18          | 0.239          |
| Neutrophils (log)       | 1.75              | 0.88                  | 2.00           | 0.046          |
| Triglycerides (log)     | 0.037             | 0.60                  | 0.06           | 0.950          |
| HDL                     | -0.01             | 0.02                  | -0.74          | 0.456          |
| Basal mRS               | -0.08             | 0.21                  | -0.37          | 0.712          |

We show the association between Aging-A and each predictor in the linear regression model, including beta coefficient assigned to each one, standard error, t-value and p-value.

**Supplementary table S4: Elastic net regression model**

|                                      | Beta value |
|--------------------------------------|------------|
| Age                                  | -7.98E-02  |
| Weight                               |            |
| Height                               | 1.50E-02   |
| Leukocytes (log transformation)      | 2.16E-01   |
| Neutrophils (log)                    | 2.93E-01   |
| Lymphocytes                          |            |
| Monocytes (log)                      | 2.70E-01   |
| Total cholesterol                    |            |
| Triglycerides (log)                  | 1.13E-03   |
| HDL                                  |            |
| LDL                                  |            |
| BMI (log)                            |            |
| Age <sup>2</sup>                     | -6.85E-04  |
| Age <sup>3</sup>                     | -7.22E-06  |
| Weight <sup>2</sup> (log)            | 4.51E-01   |
| Weight <sup>3</sup> (log)            | 2.93E-01   |
| Height <sup>2</sup>                  | 3.51E-05   |
| Height <sup>3</sup>                  | 1.09E-07   |
| Leukocytes <sup>2</sup> (log)        | 9.61E-02   |
| Leukocytes <sup>3</sup> (log)        | 5.72E-02   |
| Neutrophils <sup>2</sup> (log)       | 1.46E-01   |
| Neutrophils <sup>3</sup> (log)       | 9.60E-02   |
| Lymphocytes <sup>2</sup> (log)       | -2.84E-01  |
| Lymphocytes <sup>3</sup> (log)       | -1.81E-01  |
| Monocytes <sup>2</sup> (log)         | 1.24E-01   |
| Monocytes <sup>3</sup> (log)         | 7.04E-02   |
| Total cholesterol <sup>2</sup> (log) | -2.58E-01  |
| Total cholesterol <sup>3</sup> (log) | -1.56E-01  |
| Triglycerides <sup>2</sup> (log)     |            |
| Triglycerides <sup>3</sup> (log)     |            |
| HDL <sup>2</sup> (log)               |            |
| HDL <sup>3</sup> (log)               |            |
| LDL <sup>2</sup> (log)               |            |
| LDL <sup>3</sup> (log)               |            |
| BMI <sup>2</sup> (log)               |            |
| BMI <sup>3</sup> (log)               |            |
| Smoking - Yes                        |            |
| Alcoholism - Ex >1 year              | -4.32E-01  |
| Alcoholism - Yes                     | 1.18       |
| Sex - Male                           | 6.19E-01   |
| Basal mRS 1                          |            |
| Basal mRS 2                          |            |
| Basal mRS 3                          |            |
| Basal mRS 4-5                        |            |
| Drug consumption - Yes               |            |
| Hypertension - Yes                   | 4.47E-01   |
| Diabetes - Yes                       |            |
| Hyperlipidemia - Yes                 |            |
| Ischemic heart disease - Yes         | -5.01E-01  |
| Atrial fibrillation - Yes            |            |

Beta values assigned to each predictor in the EN model after training.

**Supplementary table S5: Associations between those variables excluded of the models (due to high proportion of missing cases) and predictions and residuals of best performing models.**

|                                               | Mean ( $\pm$ SD)/Median(IQR) | EN Predictions |         | EN Residuals |         | MLP Predictions |         | MLP Residuals |         | N   |
|-----------------------------------------------|------------------------------|----------------|---------|--------------|---------|-----------------|---------|---------------|---------|-----|
|                                               |                              | r              | p-value | r            | p-value | r               | p-value | r             | p-value |     |
| Diet variables, daily intake:                 |                              |                |         |              |         |                 |         |               |         |     |
| Energy, kilocalories                          | 2580 ( $\pm$ 1253)           | 0.161          | 0.0507  | -0.035       | 0.6763  | 0.170           | 0.0397  | -0.049        | 0.5565  | 147 |
| carbohydrates, g                              | 249 ( $\pm$ 121)             | 0.099          | 0.2334  | -0.010       | 0.9038  | 0.107           | 0.198   | -0.021        | 0.8019  | 147 |
| proteins, g                                   | 122 ( $\pm$ 63)              | 0.081          | 0.3285  | -0.039       | 0.6428  | 0.069           | 0.405   | -0.033        | 0.6948  | 147 |
| Total fat, g                                  | 120 ( $\pm$ 67)              | 0.140          | 0.0906  | -0.073       | 0.3803  | 0.154           | 0.0626  | -0.091        | 0.2714  | 147 |
| Saturated fat, g                              | 35 ( $\pm$ 20)               | 0.130          | 0.1158  | -0.074       | 0.3707  | 0.142           | 0.0856  | -0.091        | 0.2739  | 147 |
| Monounsaturated fat, g                        | 59( $\pm$ 33)                | 0.137          | 0.0989  | -0.081       | 0.3294  | 0.153           | 0.0641  | -0.102        | 0.2212  | 147 |
| Polyunsaturated fat, g                        | 18 ( $\pm$ 12)               | 0.132          | 0.1107  | -0.049       | 0.5587  | 0.141           | 0.0896  | -0.062        | 0.4570  | 147 |
| Cholesterol, g                                | 456 ( $\pm$ 305)             | 0.112          | 0.1774  | 0.026        | 0.7587  | 0.105           | 0.2073  | 0.027         | 0.7438  | 147 |
| Fiber, g                                      | 29 ( $\pm$ 16)               | -0.011         | 0.8908  | -0.015       | 0.8567  | -0.007          | 0.933   | -0.018        | 0.8248  | 147 |
| Coffee, cups                                  | 1 ( $\pm$ 1.2)               | 0.213          | <0.0001 | 0.003        | 0.9273  | 0.195           | <0.0001 | 0.006         | 0.8632  | 717 |
| Mediterranean score                           | 17,21 ( $\pm$ 2,16)          | -0.373         | 0.0065  | -0.030       | 0.8301  | -0.271          | 0.052   | -0.071        | 0.6150  | 52  |
| Moderate physical activity, min/month         | 600 (240-1590)               | -0.279         | 0.0395  | -0.003       | 0.9806  | -0.189          | 0.1668  | -0.041        | 0.7684  | 55  |
| Waist, cm                                     | 99,5( $\pm$ 14,7)            | 0.172          | <0.0001 | 0.025        | 0.5120  | 0.160           | <0.0001 | 0.025         | 0.508   | 714 |
| HbA1c, %                                      | 6,4 ( $\pm$ 1,6)             | 0.077          | 0.0955  | 0.063        | 0.1708  | 0.075           | 0.1058  | 0.062         | 0.1791  | 472 |
| Creatinine, mg/dL                             | 1 ( $\pm$ 0,58)              | -0.007         | 0.8487  | -0.010       | 0.7864  | 0.008           | 0.8253  | -0.021        | 0.5832  | 713 |
| Estimated glomerular filtration rate, CKD-EPI | 73,29 ( $\pm$ 22,55)         | 0.442          | <0.0001 | 0.060        | 0.1073  | 0.422           | <0.0001 | 0.052         | 0.1628  | 710 |
| C-reactive protein, mg/dL                     | 1,32 ( $\pm$ 2,77)           | 0.010          | 0.7662  | -0.060       | 0.1150  | -0.025          | 0.5208  | 0.004         | 0.9221  | 668 |
| Heart ejection fraction (%)                   | 61,35 ( $\pm$ 11,51)         | -0.072         | 0.1883  | 0.107        | 0.0517  | -0.046          | 0.4071  | 0.093         | 0.0901  | 331 |
| Brain Parenchymal Fraction                    | 0,95 ( $\pm$ 0,02)           | 0.229          | <0.0001 | -0.068       | 0.3213  | 0.231           | <0.0001 | -0.086        | 0.2144  | 212 |

Table shows the set of variables that could not be imputed because we had information of them only in a subset of our cohort (last column, N of individuals with information for the variable) and thus were not used for the training. First column represents the distribution of these variables in the sample, presented as mean ( $\pm$ SD) or median (IQR). We present the correlation of each variable with the predictions and residuals from both best performing models in the test dataset (EN and MLP). Values represent the Pearson or Spearman's correlation coefficient (r), according to the distribution of each variable, and p-values.

Keywords: EN, elastic net regression; IQR, interquartile range; MLP, multilayer perceptron; SD, standard deviation.

**Supplementary table S6: Correlation between best performing models' residuals and CpG  $\beta$  values included in Hannum's epigenetic clock**

| CpG        | EN Residuals |         | MLP Residuals |         |
|------------|--------------|---------|---------------|---------|
|            | r            | p-value | r             | p-value |
| cg00481951 | 0.293        | <0.0001 | 0.295         | <0.0001 |
| cg00486113 | -0.138       | <0.0001 | -0.136        | <0.0001 |
| cg00748589 | 0.14         | <0.0001 | 0.142         | <0.0001 |
| cg01528542 | -0.056       | 0.0859  | -0.062        | 0.0587  |
| cg02046143 | -0.079       | 0.0151  | -0.088        | 0.0067  |
| cg02085953 | -0.161       | <0.0001 | -0.166        | <0.0001 |
| cg02867102 | -0.119       | <0.0001 | -0.122        | <0.0001 |
| cg03032497 | 0.276        | <0.0001 | 0.274         | <0.0001 |
| cg03399905 | 0.266        | <0.0001 | 0.269         | <0.0001 |
| cg03473532 | -0.174       | <0.0001 | -0.184        | <0.0001 |
| cg03607117 | 0.228        | <0.0001 | 0.225         | <0.0001 |
| cg04416734 | -0.1         | 0.0022  | -0.11         | <0.0001 |
| cg04474832 | -0.311       | <0.0001 | -0.306        | <0.0001 |
| cg04875128 | 0.235        | <0.0001 | 0.244         | <0.0001 |
| cg04940570 | 0.222        | <0.0001 | 0.221         | <0.0001 |
| cg05442902 | -0.132       | <0.0001 | -0.137        | <0.0001 |
| cg06419846 | 0.124        | <0.0001 | 0.125         | <0.0001 |
| cg06493994 | 0.177        | <0.0001 | 0.179         | <0.0001 |
| cg06639320 | 0.424        | <0.0001 | 0.419         | <0.0001 |
| cg06685111 | -0.161       | <0.0001 | -0.171        | <0.0001 |
| cg06874016 | -0.255       | <0.0001 | -0.269        | <0.0001 |
| cg07082267 | -0.253       | <0.0001 | -0.254        | <0.0001 |
| cg07547549 | 0.27         | <0.0001 | 0.283         | <0.0001 |
| cg07553761 | 0.452        | <0.0001 | 0.443         | <0.0001 |
| cg07583137 | -0.222       | <0.0001 | -0.234        | <0.0001 |
| cg07955995 | 0.213        | <0.0001 | 0.207         | <0.0001 |
| cg08097417 | 0.171        | <0.0001 | 0.166         | <0.0001 |
| cg08234504 | -0.194       | <0.0001 | -0.203        | <0.0001 |
| cg08415592 | -0.343       | <0.0001 | -0.336        | <0.0001 |
| cg08540945 | 0.178        | <0.0001 | 0.186         | <0.0001 |
| cg09809672 | -0.13        | <0.0001 | -0.137        | <0.0001 |
| cg10501210 | -0.08        | 0.0137  | -0.096        | 0.0030  |
| cg11067179 | -0.003       | 0.9192  | 0.007         | 0.8368  |
| cg14556683 | 0.164        | <0.0001 | 0.162         | <0.0001 |
| cg14692377 | 0.35         | <0.0001 | 0.351         | <0.0001 |
| cg16054275 | -0.214       | <0.0001 | -0.222        | <0.0001 |
| cg16419235 | 0.212        | <0.0001 | 0.207         | <0.0001 |
| cg16867657 | 0.245        | <0.0001 | 0.256         | <0.0001 |
| cg19283806 | -0.106       | 0.0011  | -0.121        | <0.0001 |
| cg19722847 | -0.051       | 0.1214  | -0.049        | 0.1320  |

|            |        |         |        |         |
|------------|--------|---------|--------|---------|
| cg19935065 | 0.186  | <0.0001 | 0.191  | <0.0001 |
| cg20052760 | -0.195 | <0.0001 | -0.197 | <0.0001 |
| cg20426994 | 0.239  | <0.0001 | 0.238  | <0.0001 |
| cg20822990 | -0.29  | <0.0001 | -0.293 | <0.0001 |
| cg22016779 | -0.188 | <0.0001 | -0.202 | <0.0001 |
| cg22158769 | 0.292  | <0.0001 | 0.286  | <0.0001 |
| cg22213242 | 0.058  | 0.0762  | 0.06   | 0.0656  |
| cg22285878 | 0.181  | <0.0001 | 0.168  | <0.0001 |
| cg22454769 | 0.233  | <0.0001 | 0.233  | <0.0001 |
| cg22512670 | -0.231 | <0.0001 | -0.231 | <0.0001 |
| cg22736354 | 0.253  | <0.0001 | 0.258  | <0.0001 |
| cg22796704 | -0.18  | <0.0001 | -0.182 | <0.0001 |
| cg23091758 | 0.28   | <0.0001 | 0.278  | <0.0001 |
| cg23500537 | 0.312  | <0.0001 | 0.306  | <0.0001 |
| cg23606718 | 0.165  | <0.0001 | 0.167  | <0.0001 |
| cg23744638 | -0.074 | 0.0233  | -0.085 | 0.0094  |
| cg25410668 | 0.116  | <0.0001 | 0.123  | <0.0001 |
| cg25478614 | 0.197  | <0.0001 | 0.202  | <0.0001 |

This table shows the correlation between best performing model's residuals (EN and MLP) with CpGs  $\beta$ -values included in Hannum's clock. Values represent the Pearson or Spearman's correlation coefficient's, depending on the distribution of each variable, and  $p$ -values.

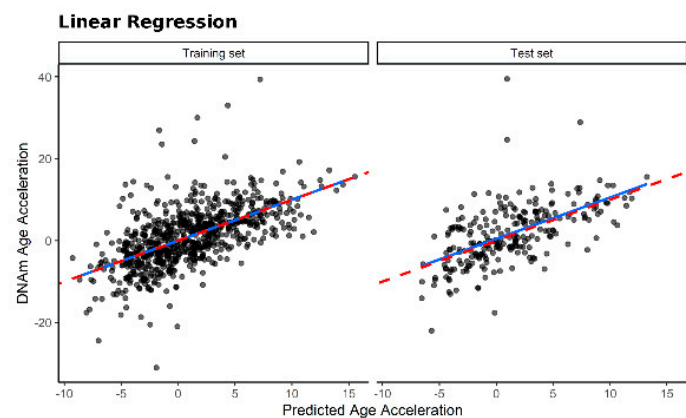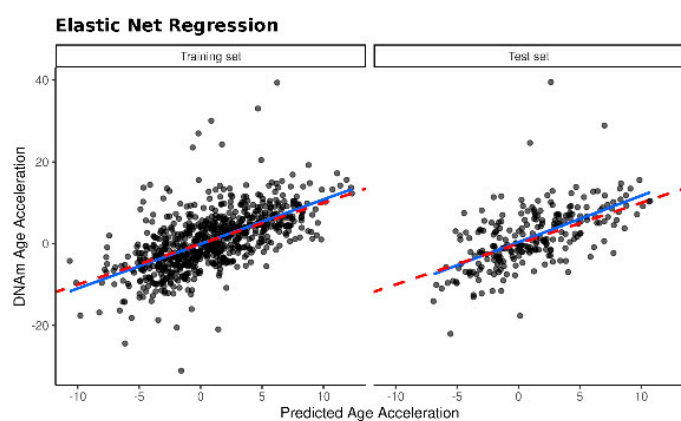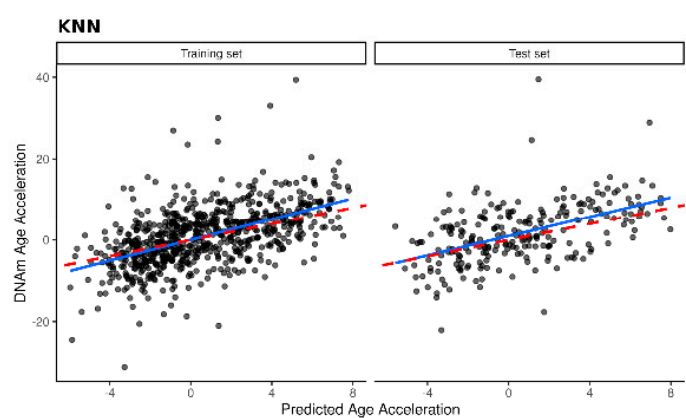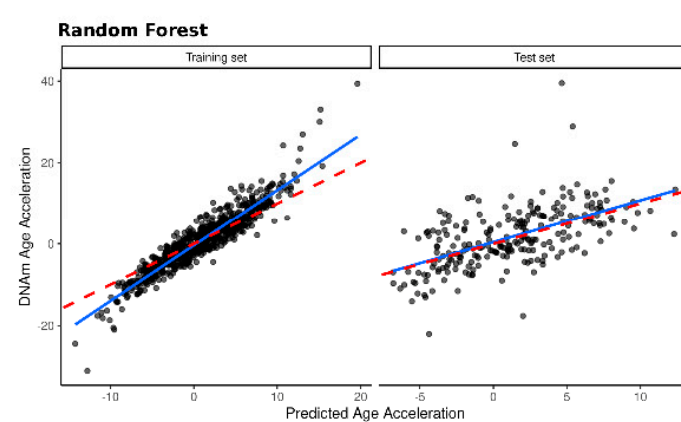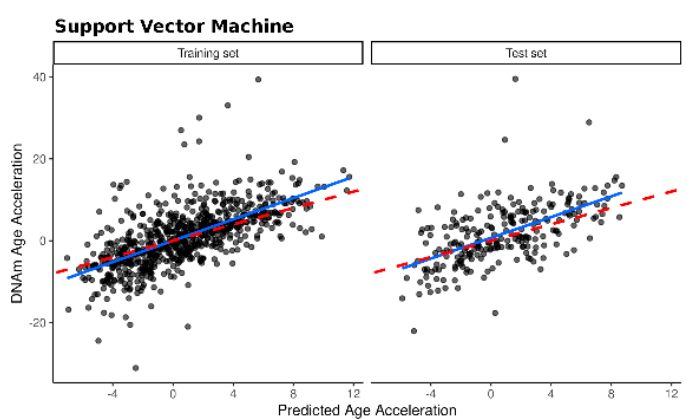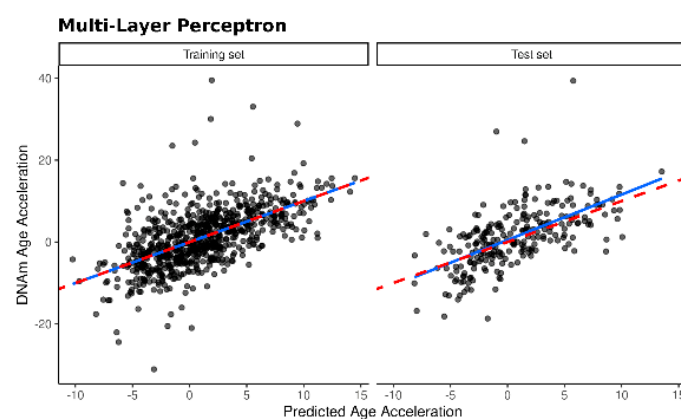

**Supplementary figure S1: Correlation between predicted and actual Aging-A values for each model.** We display the correlation between predicted and actual Aging-A values in both training and test datasets. Red dashed line shows the perfect adjustment, and the blue line shows the model linear trend.
